# Supplementary material for: Revised phylogenetic analysis of the Aetosauria (Archosauria: Pseudosuchia); assessing the effects of incongruent morphological character sets
Source: PeerJ. 2016 Jan 21;4:e1583. doi: 10.7717/peerj.1583 (PMC4727975; doi:10.7717/peerj.1583)
Supplement: Supplemental Information 18 — Table 1. Completeness of taxa scored for this phylogenetic analysis. Number of characters scored is out of 83 potential scored characters. [file peerj-04-1583-s018.xlsx]

## Sheet: Sheet1
	Number of
	characters	Percent
Taxon	scored	complete
Desmatosuchus smalli	80	0.97561
Stagonolepis robertsoni	78	0.95122
Aetosaurus ferratus	77	0.939024
Typothorax coccinarum	74	0.902439
Aetosauroides scagliai	72	0.878049
Longosuchus meadei	72	0.878049
Coahomasuchus kahleorum	68	0.829268
Stagonolepis olenkae	68	0.829268
Neoaetosauroides engaeus	67	0.817073
Desmatosuchus spurensis	65	0.792683
Stenomyti huangae	59	0.719512
SMSN 19003	54	0.658537
Scutarx deltatylus	52	0.634146
Calyptosuchus wellesi	44	0.536585
Sierritasuchus macalpini	38	0.463415
Paratypothorax sp.NA	36	0.439024
Paratypothorax andressorum	33	0.402439
Tecovasuchus chatterjeei	32	0.390244
Polesinesuchus aurelioi	31	0.378049
Rioarribasuchus chamaensis	30	0.365854
Redondasuchus rineharti	30	0.365854
Lucasuchus hunti	29	0.353659
NCSM 21723	26	0.317073
Adamanasuchus eisenhardtae	24	0.292683
Aetobarbakinoides brasiliensis	22	0.268293
Apachesuchus heckerti	18	0.219512
AVERAGE		0.599906
